# Supplementary material
Source: MDPI journal article supplement (https://www.mdpi.com/1999-5903/13/11/269)
Supplement: s1 [file s1]

## Supplementary Materials

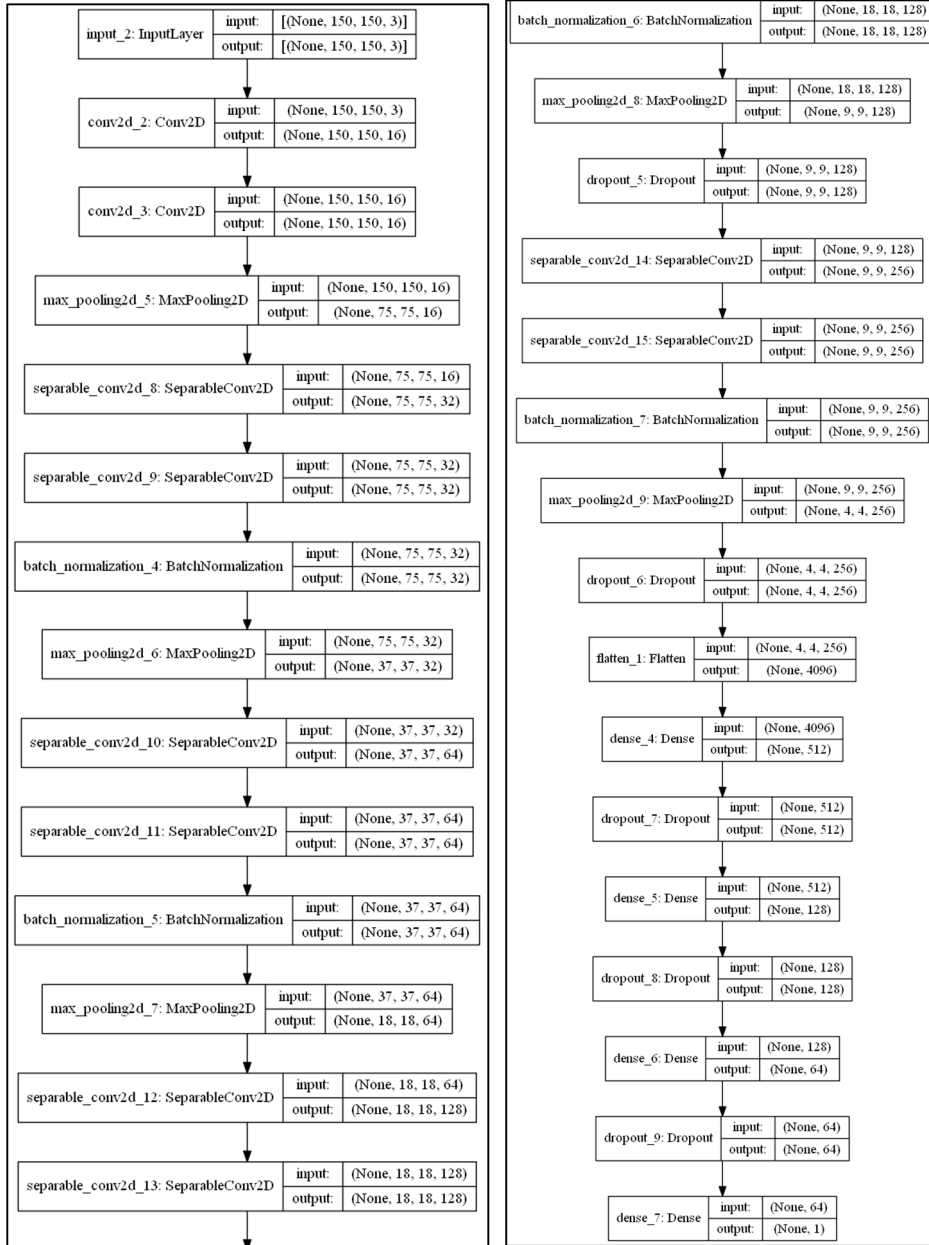

Figure S1. Detailed Layer Architecture for Chest X-Ray Model.

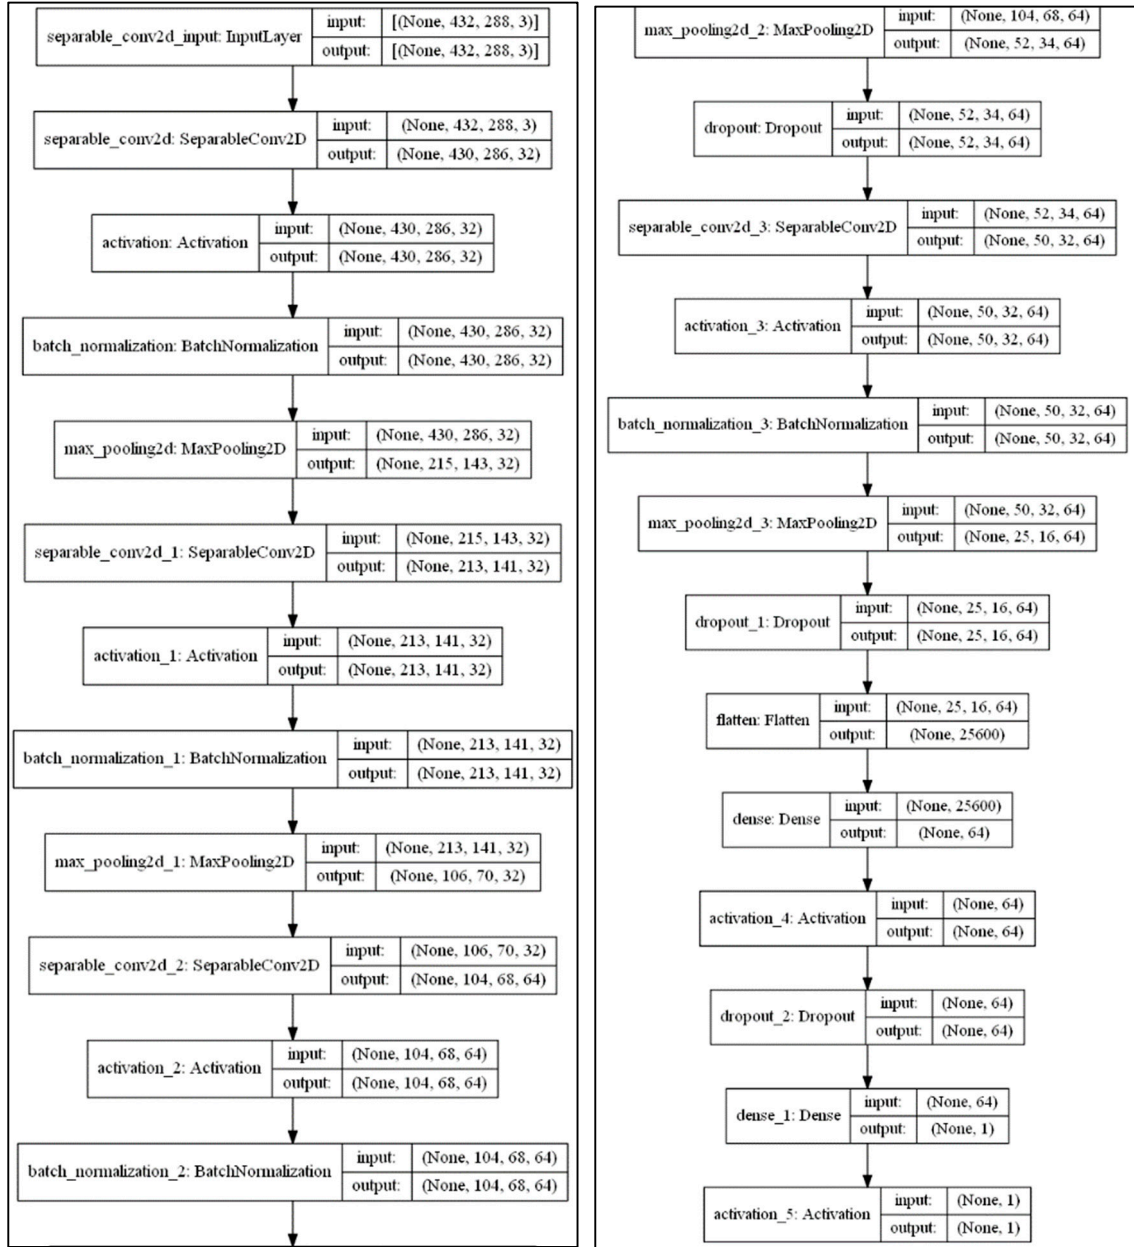

Figure S2. Detailed Layer Architecture for Cough Model.
